# Supplementary material for: School-Based Nutrition Interventions in Children Aged 6 to 18 Years: An Umbrella Review of Systematic Reviews
Source: Nutrients. 2021 Nov 17;13(11):4113. doi: 10.3390/nu13114113 (PMC8618558; doi:10.3390/nu13114113)
Supplement: Supplementary file 1 [file nutrients-13-04113-s001.zip › Supplementary files_clean.pdf]

## Supplementary files

**Table S1.** Search strategy Database(s): Medline 1946 – present.

| #  | Searches                                                                                                                                                                                                                                                                                                                                                                                                                                                                                                                                                                                                                                                                                 | Results |
|----|------------------------------------------------------------------------------------------------------------------------------------------------------------------------------------------------------------------------------------------------------------------------------------------------------------------------------------------------------------------------------------------------------------------------------------------------------------------------------------------------------------------------------------------------------------------------------------------------------------------------------------------------------------------------------------------|---------|
| 1  | child/ or Adolescent/                                                                                                                                                                                                                                                                                                                                                                                                                                                                                                                                                                                                                                                                    | 2836436 |
| 2  | ((high or middle or junior or primary or elementary or senior or prep*) adj2 (school* or student*)).mp.                                                                                                                                                                                                                                                                                                                                                                                                                                                                                                                                                                                  | 70705   |
| 3  | (child* or school?age* or adolescen* or teen*).tw.                                                                                                                                                                                                                                                                                                                                                                                                                                                                                                                                                                                                                                       | 1574723 |
| 4  | 1 or 2 or 3                                                                                                                                                                                                                                                                                                                                                                                                                                                                                                                                                                                                                                                                              | 3448445 |
| 5  | health behavior/ or body weight/ or overweight/ or obesity/ or body composition/ or waist circumference/ or anthropometry/ or beverages/ or carbonated beverages/ or fruit/ or vegetables/ or skinfold thickness/                                                                                                                                                                                                                                                                                                                                                                                                                                                                        | 533701  |
| 6  | (health?behavio* or Cogn* or behavio* or learning or attitud* or stigma).tw.                                                                                                                                                                                                                                                                                                                                                                                                                                                                                                                                                                                                             | 1919058 |
| 7  | (Eating?behavio* or eat* or diet* or fruit* or vegetable* or sugar?sweetened or drink* or beverage* or soft?drink* or water or food* or nutrition or energy?dens* or sugar or energy?rich or portion?size or fast?food* or nutrient?assessment).tw.                                                                                                                                                                                                                                                                                                                                                                                                                                      | 2029051 |
| 8  | (body?weight or weight or overweight or obes* or BMI or Body?Mass?Index or waist?circumference or anthropomet* or body?composition or skinfold* or high?weight or fat*).tw.                                                                                                                                                                                                                                                                                                                                                                                                                                                                                                              | 1870850 |
| 9  | 5 or 6 or 7 or 8                                                                                                                                                                                                                                                                                                                                                                                                                                                                                                                                                                                                                                                                         | 5213397 |
| 10 | mass media/ or diet/ or television/ or meals/ or food/ or cell phone/                                                                                                                                                                                                                                                                                                                                                                                                                                                                                                                                                                                                                    | 225511  |
| 11 | (cafeteria* or canteen* or cafe* or school?lunch* or school?meal? or food or feeding?program or food?service* or diet* or meal? or nutrition or purchas* or sold or bought or buy or school*).tw.                                                                                                                                                                                                                                                                                                                                                                                                                                                                                        | 1353397 |
| 12 | (mass?media or campaign* or consumer?research or (health adj (communication or information)) or advertis* or marketing or social?media).tw.                                                                                                                                                                                                                                                                                                                                                                                                                                                                                                                                              | 107727  |
| 13 | (screen?viewing or television or tv or video?games or computer or screen?media or mobile?phone or cell?phone or electronic or technolo*).tw.                                                                                                                                                                                                                                                                                                                                                                                                                                                                                                                                             | 934025  |
| 14 | 10 or 11 or 12 or 13                                                                                                                                                                                                                                                                                                                                                                                                                                                                                                                                                                                                                                                                     | 2380153 |
| 15 | (((comprehensive* or integrative or systematic*) adj3 (bibliographic* or review* or literature)) or (meta-analy* or metaanaly* or "research synthesis" or ((information or data) adj3 synthesis) or (data adj2 extract*))).ti,ab. or (cinahl or (cochrane adj3 trial*) or embase or medline or psyclit or (psycinfo not "psycinfo database") or pubmed or scopus or "sociological abstracts").ab. or ("cochrane database" or evidence report technology assessment or evidence report technology assessment summary).jn. or Evidence Report: Technology Assessment*.jn. or ((review adj5 (rationale or evidence)).ti,ab. and review.pt.) or meta-analysis as topic/ or Meta-Analysis.pt. | 489135  |
| 16 | ("clinical trial" or "clinical trial, phase i" or "clinical trial, phase ii" or clinical trial, phase iii or clinical trial, phase iv or controlled clinical trial or "multicenter study" or "randomized controlled trial").pt. or double-blind method/ or clinical trials as topic/ or controlled clinical?trials as topic/ or randomized?controlled?trials as topic/ or early termination of clinical trials as topic/ or multicenter studies as topic/ or ((randomi?ed adj7 trial*) or (controlled adj3 trial*) or (clinical adj2 trial*) or ((single or doubl* or tripl* or treb*) and (blind* or mask*))).ti,ab,kw. or ("4 arm" or "four?arm").ti,ab,kw.                            | 1618844 |

|    |                                                                                                                                                                                            |         |
|----|--------------------------------------------------------------------------------------------------------------------------------------------------------------------------------------------|---------|
| 17 | cohort studies/ or longitudinal studies/ or follow-up studies/ or prospective studies/ or retrospective studies/ or cohort.mp. or longitudinal.mp. or prospective.mp. or retrospective.mp. | 2726476 |
| 18 | 16 or 17                                                                                                                                                                                   | 3892382 |
| 19 | 4 and 9 and 14 and 15 and 18                                                                                                                                                               | 3753    |
| 20 | limit 19 to (english language and yr="2010 -Current")                                                                                                                                      | 2929    |

**Table S2.** Overlap matrix of the RCTs of school-based nutrition interventions reporting a dietary intake outcome.

|                     | Education           |                 | Environment     |                 |                 | HPS*              | Other             |                          |                  |                     |                   |                |                   |
|---------------------|---------------------|-----------------|-----------------|-----------------|-----------------|-------------------|-------------------|--------------------------|------------------|---------------------|-------------------|----------------|-------------------|
| Primary study ID    | Meiklejohn 2016 [1] | Rahman 2017 [2] | Bonell 2013 [3] | Micha 2018 [4]  | Pineda 2021 [5] | Langford 2014 [6] | Champion 2019 [7] | Delgado-Noguera 2011 [8] | Evans 2012 [9]** | MacArthur 2018 [10] | Nally 2021 [11]** | Rose 2021 [12] | Singhal 2020 [13] |
| Aceves-Martins 2017 |                     |                 |                 |                 |                 |                   |                   |                          |                  |                     |                   | FV             |                   |
| Akdemir 2017        |                     |                 |                 |                 |                 |                   |                   |                          |                  |                     |                   |                | Diet in general   |
| Alvirde-García 2013 |                     |                 |                 |                 |                 |                   |                   |                          |                  |                     |                   |                | Diet in general   |
| Amaro 2006          |                     |                 |                 |                 |                 |                   |                   | FV                       |                  |                     |                   |                |                   |
| Anderson 2005       |                     |                 |                 | Fruit, vege, FV | Fruit, vege     | Fruit, fat        |                   |                          |                  |                     |                   |                |                   |
| Ashfield-Watt 2009  |                     |                 |                 | Fruit           | Fruit           |                   |                   |                          |                  |                     |                   |                |                   |
| Baranowski 2000     |                     |                 |                 |                 |                 |                   |                   | FV                       |                  |                     |                   |                |                   |
| Baranowski 2003     |                     |                 |                 |                 |                 |                   |                   | FV                       |                  |                     |                   |                |                   |
| Bayer 2009          |                     | SSB             |                 |                 |                 |                   |                   |                          |                  |                     |                   |                |                   |
| Bere 2005           |                     |                 |                 | FV              |                 |                   |                   |                          |                  |                     |                   |                |                   |
| Bere 2006a          |                     |                 |                 | FV              |                 |                   |                   | FV                       |                  |                     |                   |                |                   |
| Bere 2006b          | FV                  |                 |                 |                 |                 | Fruit             |                   |                          |                  |                     |                   |                |                   |
| Bere 2010           |                     |                 |                 |                 | Fruit           |                   |                   |                          |                  |                     |                   |                |                   |
| Bere 2015           |                     |                 |                 |                 | Fruit           |                   |                   |                          |                  |                     |                   |                |                   |
| Bessems 2012        |                     |                 |                 |                 |                 |                   |                   |                          |                  |                     |                   | FV             |                   |
| Birnbaum 2002       | FV, fat             |                 |                 |                 |                 |                   |                   |                          |                  |                     |                   |                |                   |
| Bjelland 2011       | SSB                 | SSB             |                 |                 |                 |                   |                   |                          |                  |                     |                   |                |                   |
| Bush 1989           |                     |                 |                 |                 |                 |                   |                   |                          |                  | Diet in general     |                   |                |                   |
| Caballero 2003      |                     |                 |                 |                 |                 | Fat               |                   |                          |                  |                     |                   |                |                   |
| Carfora 2016        |                     |                 |                 |                 |                 |                   |                   |                          |                  |                     |                   | FV             |                   |

|                    | Education           |                 | Environment     |                |                 | HPS*              | Other             |                          |                  |                     |                   |                |                   |
|--------------------|---------------------|-----------------|-----------------|----------------|-----------------|-------------------|-------------------|--------------------------|------------------|---------------------|-------------------|----------------|-------------------|
| Primary study ID   | Meiklejohn 2016 [1] | Rahman 2017 [2] | Bonell 2013 [3] | Micha 2018 [4] | Pineda 2021 [5] | Langford 2014 [6] | Champion 2019 [7] | Delgado-Noguera 2011 [8] | Evans 2012 [9]** | MacArthur 2018 [10] | Nally 2021 [11]** | Rose 2021 [12] | Singhal 2020 [13] |
| Casazza 2007       |                     |                 |                 |                |                 |                   | FV, fat           |                          |                  |                     |                   |                |                   |
| Cohen 2015         |                     |                 |                 |                | Vege            |                   |                   |                          |                  |                     |                   |                |                   |
| Coleman 2012       |                     |                 |                 | SSB            |                 |                   |                   |                          |                  |                     |                   |                |                   |
| Colín-Ramírez 2010 |                     |                 |                 |                |                 | Fat               |                   |                          |                  |                     |                   |                |                   |
| Crepinsek 2006     |                     |                 |                 |                | Vege            |                   |                   |                          |                  |                     |                   |                |                   |
| Crespo 2012        |                     |                 |                 |                |                 | Fruit             |                   |                          |                  |                     |                   |                |                   |
| Cunha 2013         |                     | SSB             |                 |                |                 |                   |                   |                          |                  |                     |                   |                | Diet in general   |
| Day 2008           |                     |                 |                 |                | Fruit           |                   |                   |                          |                  |                     |                   |                |                   |
| Dzewaltowski 2009  |                     |                 | Diet in general |                |                 |                   |                   |                          |                  |                     |                   |                |                   |
| Eriksen 2003       |                     |                 |                 |                | Vege            |                   |                   |                          |                  |                     |                   |                |                   |
| Evans 2013         |                     |                 |                 |                |                 | Fruit, fat        |                   |                          |                  |                     |                   |                |                   |
| Ezendam 2012       |                     | SSB             |                 |                |                 |                   | FV                |                          |                  |                     |                   |                |                   |
| Foster 2008        | Unclear             |                 |                 |                | Fruit           | Fruit, fat        |                   |                          |                  |                     |                   |                |                   |
| Foster 2010        |                     |                 |                 |                |                 | Fruit, fat        |                   |                          |                  |                     |                   |                |                   |
| Gortmaker 1999     |                     |                 |                 |                | Fruit           |                   |                   |                          |                  |                     |                   |                |                   |
| Habib-Mourad 2013  |                     |                 |                 |                |                 |                   |                   |                          |                  |                     |                   |                | Diet in general   |
| Haerens 2006       | Fruit, fat, SSB     |                 |                 |                |                 | Fruit, fat        | FV, fat           |                          |                  |                     |                   |                |                   |
| Haerens 2007       | Fruit, fat, SSB     | SSB             |                 |                |                 |                   | Fat               |                          |                  |                     |                   |                |                   |
| He 2009            |                     |                 |                 | FV             |                 |                   |                   |                          |                  |                     |                   |                |                   |
| Hoppu 2010         | Fruit, FV           |                 |                 | Fruit          |                 | Fruit, fat        |                   |                          |                  |                     |                   | FV, SSB        |                   |
| James 2004         |                     | SSB             |                 |                |                 |                   |                   |                          |                  |                     |                   |                |                   |
| Keshani 2016       |                     |                 |                 |                |                 |                   |                   |                          |                  |                     |                   |                | Diet in general   |

|                   | Education           |                 | Environment     |                         |                 | HPS*              | Other             |                          |                  |                     |                   |                        |                   |
|-------------------|---------------------|-----------------|-----------------|-------------------------|-----------------|-------------------|-------------------|--------------------------|------------------|---------------------|-------------------|------------------------|-------------------|
| Primary study ID  | Meiklejohn 2016 [1] | Rahman 2017 [2] | Bonell 2013 [3] | Micha 2018 [4]          | Pineda 2021 [5] | Langford 2014 [6] | Champion 2019 [7] | Delgado-Noguera 2011 [8] | Evans 2012 [9]** | MacArthur 2018 [10] | Nally 2021 [11]** | Rose 2021 [12]         | Singhal 2020 [13] |
| Kobel 2014        |                     | SSB             |                 |                         |                 |                   |                   |                          |                  |                     |                   |                        |                   |
| Levy 2012         |                     |                 |                 |                         |                 | Fat               |                   |                          |                  |                     |                   |                        |                   |
| Li 2017           |                     |                 |                 |                         |                 |                   |                   |                          |                  |                     |                   |                        | Diet in general   |
| Liu 2018          |                     |                 |                 |                         |                 |                   |                   |                          |                  |                     |                   |                        | Diet in general   |
| Luepker 1998      |                     |                 |                 |                         |                 | Fat               |                   |                          |                  |                     |                   |                        |                   |
| Lytle 2004a       | FV, fat             |                 |                 | Fruit, vege, FV         |                 | Fruit, fat        |                   |                          |                  |                     |                   |                        |                   |
| Lytle 2004b       |                     |                 |                 |                         | Fruit, vege     |                   |                   |                          |                  |                     |                   |                        |                   |
| Mangunkusumo 2007 |                     |                 |                 |                         |                 |                   |                   | FV                       |                  |                     |                   |                        |                   |
| Mauriello 2010    |                     |                 |                 |                         |                 |                   | FV                |                          |                  |                     |                   |                        |                   |
| Mihas 2010        | Fruit, diet, fat    |                 |                 |                         |                 |                   |                   |                          |                  |                     |                   | Sat fat, energy, fruit |                   |
| Millar 2011       | Diet in general     |                 |                 |                         |                 |                   |                   |                          |                  |                     |                   |                        |                   |
| Moore 2008        |                     |                 |                 | Fruit, unhealthy snacks | Fruit           |                   |                   | FV                       |                  |                     |                   |                        |                   |
| Muckelbauer 2009  |                     | SSB             |                 |                         |                 |                   |                   |                          |                  |                     |                   |                        |                   |
| Nader 1999        |                     |                 |                 |                         |                 |                   |                   |                          |                  | Diet in general     |                   |                        |                   |
| Nicklas 1996      |                     |                 |                 | Fat, sat fat, calories  |                 |                   |                   |                          |                  |                     |                   |                        |                   |
| Pannunzio 2007    |                     |                 |                 |                         |                 |                   |                   | FV                       |                  |                     |                   |                        |                   |
| Perry 1998        |                     |                 |                 |                         |                 | Fruit, fat        |                   | FV                       |                  |                     |                   |                        |                   |
| Perry 2004        |                     |                 |                 |                         |                 |                   |                   | FV                       |                  |                     |                   |                        |                   |

|                  | Education           |                 | Environment     |                        |                 | HPS*              | Other             |                          |                  |                     |                   |                |                   |
|------------------|---------------------|-----------------|-----------------|------------------------|-----------------|-------------------|-------------------|--------------------------|------------------|---------------------|-------------------|----------------|-------------------|
| Primary study ID | Meiklejohn 2016 [1] | Rahman 2017 [2] | Bonell 2013 [3] | Micha 2018 [4]         | Pineda 2021 [5] | Langford 2014 [6] | Champion 2019 [7] | Delgado-Noguera 2011 [8] | Evans 2012 [9]** | MacArthur 2018 [10] | Nally 2021 [11]** | Rose 2021 [12] | Singhal 2020 [13] |
| Prell 2005       | Fish                |                 |                 |                        |                 |                   |                   |                          |                  |                     |                   |                |                   |
| Prochaska 2004   |                     |                 |                 |                        |                 |                   | FV                |                          |                  |                     |                   |                |                   |
| Ransley 2007     |                     |                 |                 |                        | Vege            |                   |                   |                          |                  |                     |                   |                |                   |
| Rees 2010        |                     |                 |                 |                        |                 |                   |                   |                          |                  |                     |                   | FV             |                   |
| Reinaerts 2007   |                     |                 |                 |                        |                 |                   |                   | FV                       |                  |                     |                   |                |                   |
| Reynolds 2000    |                     |                 |                 |                        |                 | Fruit, fat        |                   | FV                       |                  |                     |                   |                |                   |
| Rosario 2013     |                     | SSB             |                 |                        |                 |                   |                   |                          |                  |                     |                   |                |                   |
| Sahota 2001      |                     |                 |                 |                        |                 | Fruit, fat        |                   | FV                       |                  |                     |                   |                |                   |
| Sallis 2003      |                     |                 | Diet in general |                        |                 | Fat               |                   |                          |                  |                     |                   |                |                   |
| Saraf 2015       |                     |                 |                 |                        |                 |                   |                   |                          |                  | Diet in general     |                   |                |                   |
| Sgambato 2016    |                     |                 |                 |                        |                 |                   |                   |                          |                  |                     |                   |                | Diet in general   |
| Sichieri 2009    |                     | SSB             |                 |                        |                 |                   |                   |                          |                  |                     |                   |                | Diet in general   |
| Siege-Riz 2011   |                     | SSB             |                 |                        |                 |                   |                   |                          |                  |                     |                   |                |                   |
| Singh 2009       |                     | SSB             |                 |                        |                 |                   |                   |                          |                  |                     |                   | SSB            |                   |
| Te Velde 2008    | Fruit, FV           |                 |                 | Fruit, vege, FV        | Fruit, vege     | Fruit             |                   | FV                       |                  |                     |                   |                |                   |
| Trevino 2004     |                     |                 |                 |                        |                 | Fat               |                   |                          |                  |                     |                   |                |                   |
| van Nassau 2014  |                     |                 |                 |                        |                 |                   |                   |                          |                  |                     |                   | SSB, breakfast |                   |
| Velicer 2013     |                     |                 |                 |                        |                 |                   | FV                |                          |                  |                     |                   |                |                   |
| Viggiano 2015    |                     |                 |                 |                        |                 |                   |                   |                          |                  |                     |                   | FV             |                   |
| Williamson 2007  |                     |                 |                 | Fat, sat fat, calories |                 |                   |                   |                          |                  |                     |                   |                |                   |
| Williamson 2012  |                     |                 |                 |                        |                 | Fat               |                   |                          |                  |                     |                   |                |                   |

|                  | Education           |                 | Environment     |                |                 | HPS*              | Other             |                          |                  |                     |                   |                |                   |
|------------------|---------------------|-----------------|-----------------|----------------|-----------------|-------------------|-------------------|--------------------------|------------------|---------------------|-------------------|----------------|-------------------|
| Primary study ID | Meiklejohn 2016 [1] | Rahman 2017 [2] | Bonell 2013 [3] | Micha 2018 [4] | Pineda 2021 [5] | Langford 2014 [6] | Champion 2019 [7] | Delgado-Noguera 2011 [8] | Evans 2012 [9]** | MacArthur 2018 [10] | Nally 2021 [11]** | Rose 2021 [12] | Singhal 2020 [13] |
| Xu 2014          |                     |                 |                 |                |                 |                   |                   |                          |                  |                     |                   |                | Diet in general   |

Abbreviations: FV fruit and/or vegetable; HPS Health Promoting School; Sat fat saturated fat; SSB sugar-sweetened beverage; Vege vegetable. \*School interventions based on the Health Promoting Schools (HPS) framework, with active components in school education, environment and partnerships. \*\*Evans 2012 and Nally 2021 did not provide enough information to be able to identify which of the primary studies were included in the meta-analyses.

**Table S3.** Methodological quality assessment for each systematic review, according to the AMSTAR2 scale.

| Reference                | 1 | 2  | 3 | 4  | 5 | 6 | 7 | 8  | 9a | 9b | 10 | 11a | 11b | 12  | 13 | 14 | 15  | 16 |
|--------------------------|---|----|---|----|---|---|---|----|----|----|----|-----|-----|-----|----|----|-----|----|
| Bonell 2013 [3]          | Y | Y  | N | PY | Y | Y | N | Y  | N  | NA | N  | NMA | NA  | NMA | Y  | Y  | NMA | Y  |
| Champion 2019 [7]        | Y | Y  | N | PY | Y | Y | N | Y  | Y  | NA | N  | Y   | NA  | N   | Y  | Y  | N   | Y  |
| Delgado-Noguera 2011 [8] | Y | N  | N | PY | N | N | N | PY | N  | NA | N  | Y   | NA  | Y   | Y  | Y  | N   | Y  |
| Evans 2012 [9]           | Y | N  | N | PY | Y | N | N | N  | PY | NA | N  | Y   | NA  | N   | N  | Y  | Y   | Y  |
| Langford 2014 [6]        | Y | Y  | Y | PY | Y | Y | Y | Y  | Y  | NA | Y  | Y   | NA  | Y   | Y  | Y  | Y   | Y  |
| MacArthur 2018 [10]      | Y | Y  | Y | Y  | Y | Y | Y | Y  | Y  | NA | Y  | Y   | NA  | Y   | Y  | Y  | Y   | Y  |
| Meiklejohn 2016 [1]      | Y | N  | N | N  | N | Y | N | N  | N  | NA | N  | NMA | NA  | NMA | N  | N  | NMA | Y  |
| Micha 2018 [4]           | Y | PY | N | PY | Y | Y | N | N  | N  | NA | N  | Y   | NA  | Y   | N  | Y  | N   | Y  |
| Nally 2021 [11]          | Y | Y  | N | N  | Y | N | N | Y  | Y  | NA | N  | Y   | NA  | Y   | N  | Y  | Y   | Y  |
| Pineda 2021 [5]          | Y | Y  | N | N  | Y | N | N | PY | Y  | NA | N  | N   | NA  | N   | Y  | Y  | Y   | Y  |
| Rahman 2017 [2]          | Y | N  | Y | N  | Y | Y | Y | Y  | Y  | NA | Y  | Y   | NA  | N   | N  | Y  | Y   | Y  |
| Rose 2021 [12]           | Y | PY | N | PY | N | Y | Y | PY | PY | NA | N  | NMA | NA  | NMA | N  | N  | NMA | Y  |
| Singhal 2020 [13]        | Y | PY | N | PY | N | N | N | Y  | Y  | NA | N  | NMA | NA  | NMA | Y  | N  | NMA | Y  |

Abbreviation: Y yes; N no; PY partial yes; NMA no meta-analysis conducted. (1) Did the research questions and inclusion criteria for the review include the components of PICO (Population, Intervention, Comparator, Outcome)? (2) Did the report of the review contain an explicit statement that the review methods were established prior to the conduct of the review and did the report justify any significant deviations from the protocol? (3) Did the review authors explain their selection of the study designs for inclusion in the review? (4) Did the review authors use a comprehensive literature search strategy? (5) Did the review authors perform study selection in duplicate? (6) Did the review authors perform data extraction in duplicate? (7) Did the review authors provide a list of excluded studies and justify the exclusions? (8) Did the review authors describe the included studies in adequate detail? (9) Did the review authors use a satisfactory technique for assessing the risk of bias (RoB) in individual studies that were included in the review? (9a) Randomised controlled trials (RCTs) (9b) non-randomized studies of interventions (NRSI) (10) Did the review report on the sources of funding for the studies included in the review? (11) If meta-analysis was performed did the review authors use appropriate methods for statistical combination of results? (11a) RCTs (11b) NRSI (12) If meta-analysis was performed, did the review authors assess the potential impact of RoB in individual studies on the results of the meta-analysis or other evidence synthesis? (13) Did the review authors account for RoB in individual studies when interpreting/discussing the results of the review? (14) Did the review authors provide a satisfactory explanation for, and discussion of, any heterogeneity observed in the results of the review? (15) If they performed quantitative synthesis did the review authors carry out an adequate investigation of publication bias (small study bias) and discuss its likely impact on the results of the review? (16) Did the review authors report any potential sources of conflict of interest, including any funding they received for conducting the review? The overall confidence in the results of the systematic reviews proposed by the AMSTAR2 tool is: defined as: (1) high—No, or one non-critical weakness: the systematic review provides an accurate and comprehensive summary of the results; (2) moderate—more than one non-critical weakness but no critical flaws: the systematic review provides an accurate summary of the results; (3) low—one critical flaw, with or without non-critical weaknesses: the systematic review may not provide an accurate and comprehensive summary of the results; (4) critically low—more than one critical flaw, with or without non-critical weaknesses: the review should not be relied on to provide an accurate and comprehensive summary of the results.

## References

1. Meiklejohn, S.; Ryan, L.; Palermo, C. A Systematic Review of the Impact of Multi-Strategy Nutrition Education Programs on Health and Nutrition of Adolescents. *J. Nutr. Educ. Behav.* **2016**, *48*, 631–646. e1, doi:10.1016/j.jneb.2016.07.015.
2. Rahman, AA.; Lamis, J.; Kahale, LA.; Adair, P.; Pine, C. Effectiveness of Behavioral Interventions to Reduce the Intake of Sugar-Sweetened Beverages in Children and Adolescents: A Systematic Review and Meta-Analysis. *Nutr. Rev.* **2017**, *76*, 88–107, doi:10.1093/nutrit/nux061.
3. Bonell, C.; Jamal, F.; Harden, A.; Wells, H.; Parry, W.; Fletcher, A.; Petticrew, M.; Thomas, J.; Whitehead, M.; Campbell, R.; et al. Systematic Review of the Effects of Schools and School Environment Interventions on Health: Evidence Mapping and Synthesis. **2013**, *1*, doi:10.3310/phr01010.
4. Micha, R.; Karageorgou, D.; Bakogianni, I.; Trichia, E.; Whitsel, LP.; Story, M.; Peñalvo, JL.; Mozaffarian, D. Effectiveness of School Food Environment Policies on Children's Dietary Behaviors: A Systematic Review and Meta-Analysis. *PLoS One* **2018**, *13*, e0194555, doi:10.1371/journal.pone.0194555.
5. Pineda, E.; Bascunan, J.; Sassi, F. Improving the School Food Environment for the Prevention of Childhood Obesity: What Works and What Doesn't. *Obes. Rev.* **2021**, *22*, doi:10.1111/obr.13176.
6. Langford, R.; Bonell, C.P.; Jones, H.E.; Pouliou, T.; Murphy, S.M.; Waters, E.; Komro, K.A.; Gibbs, L.F.; Magnus, D.; Campbell, R. The WHO Health Promoting School Framework for Improving the Health and Well-Being of Students and Their Academic Achievement. *Cochrane Database Syst. Rev.* **2014**, CD008958, doi:10.1002/14651858.CD008958.pub2.
7. Champion, KE.; Parmenter, B.; McGowan, C.; Spring, B.; Wafford, QE.; Gardner, LA.; Thornton, L.; McBride, N.; Barrett, EL.; Teesson, M. Effectiveness of School-Based EHealth Interventions to Prevent Multiple Lifestyle Risk Behaviours among Adolescents: A Systematic Review and Meta-Analysis. *Lancet Digit. Health* **2019**, *1*, e206–e221, doi:10.1016/S2589-7500(19)30088-3.
8. Delgado-Noguera, M.; Tort, S.; Martinez-Zapata, MJ.; Bonfill, X. Primary School Interventions to Promote Fruit and Vegetable Consumption: A Systematic Review and Meta-Analysis. *Prev. Med.* **2011**, *53*, 3–9, doi:10.1016/j.ypmed.2011.04.016.
9. Evans, CE.; Christian, MS.; Cleghorn, CL.; Greenwood, DC.; Cade, JE. Systematic Review and Meta-Analysis of School-Based Interventions to Improve Daily Fruit and Vegetable Intake in Children Aged 5 to 12 y. *Am J Clin Nutr* **2012**, *96*, 889–901, doi:10.3945/ajcn.111.030270.
10. MacArthur, G.; Caldwell, DM.; Redmore, J.; Watkins, SH.; Kipping, R.; White, J.; Chittleborough, C.; Langford, R.; Er, V.; Lingam, R.; et al. Individual-, Family-, and School-Level Interventions Targeting Multiple Risk Behaviours in Young People. *Cochrane Database Syst. Rev.* **2018**, *10*, CD009927, doi:10.1002/14651858.CD009927.pub2.
11. Nally, S.; Carlin, A.; Blackburn, N.E.; Baird, J.S.; Salmon, J.; Murphy, M.H.; Gallagher, A.M. The Effectiveness of School-Based Interventions on Obesity-Related Behaviours in Primary School Children: A Systematic Review and Meta-Analysis of Randomised Controlled Trials. *Child. Basel Switz.* **2021**, *8*, 489, doi:10.3390/children8060489.
12. Rose, K.; O'Malley, C.; Eskandari, F.; Lake, A.A.; Brown, L.; Ells, L.J. The Impact of, and Views on, School Food Intervention and Policy in Young People Aged 11–18 Years in Europe: A Mixed Methods Systematic Review. *Obes. Rev.* **2021**, *22*, e13186-n/a, doi:10.1111/obr.13186.
13. Singhal, J.; Herd, C.; Adab, P.; Pallan, M. Effectiveness of School-Based Interventions to Prevent Obesity among Children Aged 4 to 12 Years Old in Middle-Income Countries: A Systematic Review and Meta-Analysis. *Obes. Rev.* **2020**, *28*, doi:10.1111/obr.13105.
